# Supplementary material for: Beyond Colonial Boundaries: Reimagining the Rozvi through Landscapes, Identities and Indigenous Epistemologies
Source: MDPI journal article supplement (doi:10.3390/land12081625), 2023-08-18
Supplement: s1 [file s1]

| A detailed summary of samples submitted for radiocarbon dating and calibrated dates from the three research sites                        |                       |                      |                                                                                         |                  |             |                    |                    |                             |                  |
|------------------------------------------------------------------------------------------------------------------------------------------|-----------------------|----------------------|-----------------------------------------------------------------------------------------|------------------|-------------|--------------------|--------------------|-----------------------------|------------------|
| Context/matrix description                                                                                                               | Level                 | Radiocarbon Age B.P. | Date                                                                                    | 1 $\sigma$ Error | Lab Number  | Sample Number      | Material of sample | Sigma <sup>13</sup> C Value | 1 $\sigma$ error |
| <b>Dates from Danamombe Trench I, Main Platform and Test Pit II, Midden</b>                                                              |                       |                      |                                                                                         |                  |             |                    |                    |                             |                  |
| <b>Trench I Main Platform:</b> Burnt ashy layer lying just below the first four hut floors, but resting on closely packed granite blocks | 5<br>(40–50 cm)       | 84                   | 1696–1725<br>1814–1836<br>1845–1848<br>1877–1917                                        | 31               | D-AMS024212 | DANAMOMBE Sample 1 | Charcoal           | 98.96                       | 0.38             |
| <b>Trench I Main Platform:</b> Heavily burnt ashy layer extending from well-packed blocks, but situated above Hut Floor 5                | 11–12<br>(110–120 cm) | 108                  | 1694–1713<br>1716–1727<br>1813–1854<br>1857–1863<br>1866–1891<br>1909–1918              | 24               | D-AMS024213 | DANAMOMBE Sample 2 | Charcoal           | 98.66                       | 0.29             |
| <b>Trench I Main Platform:</b> Large packed blocks lying just under Hut Floor 6, with signs of heavy burning on its floor surface        | 16<br>(150–160 cm)    | 439                  | 1433–1457                                                                               | 28               | D-AMS024214 | DANAMOMBE Sample 3 | Charcoal           | 94.68                       | 0.33             |
| <b>Test Pit II/Midden</b> 300 m away from platform: Fine-textured ashy layer                                                             | 7<br>(60–70 cm)       | 185                  | 1665–1682<br>1736–1786<br>1792–1805<br>1935–1950                                        | 33               | D-AMS024215 | DANAMOMBE Sample 4 | Charcoal           | 97.72                       | 0.4              |
| <b>Dates from Naletale Test Pit I, Main Platform</b>                                                                                     |                       |                      |                                                                                         |                  |             |                    |                    |                             |                  |
| <b>Test Pit I Naletale Main Platform:</b> Compacted gritty reddish-brown soil just above Hut Floor 1                                     | 2<br>(10–20 cm)       | 152                  | 1670–1694<br>1727–1779<br>1798–1813<br>1839–1841<br>1854–1857<br>1862–1866<br>1918–1950 | 29               | D-AMS024219 | NALETALE Sample 3  | Charcoal           | 98.13                       | 0.36             |
| <b>Test Pit I Naletale Main Platform:</b> Reddish-brown layer just below Hut Floor 1, but extending into packed granite blocks           | 6–7<br>(50–70 cm)     | 170                  | 1669–1683<br>1736–1780<br>1798–1805<br>1934–1945                                        | 22               | D-AMS024218 | NALETALE Sample 2  | Charcoal           | 97.90                       | 0.27             |
| <b>Test Pit I Naletale Main Platform:</b> Neatly packed stones just below Hut Floor 3, these blocks were laid on bedrock                 | 12–13<br>(110–130 cm) | 189                  | 1664–1681<br>1738–1755<br>1762–1787<br>1791–1803<br>1937–1950                           | 30               | D-AMS024217 | NALETALE Sample 1  | Charcoal           | 97.67                       | 0.37             |
| <b>Dates from Zinjanja Test Pit II and Test Pit III Midden area</b>                                                                      |                       |                      |                                                                                         |                  |             |                    |                    |                             |                  |
| <b>Zinjanja Test Pit II/Midden</b> 200 m away from Main Platform: Gray compacted soil extending into a sterile layer                     | 7<br>(60–70 cm)       | 118                  | 1687–1709<br>1717–1730<br>1809–1828<br>1831–1889<br>1910–1926                           | 29               | D-AMS024220 | ZINJANJA Sample 1  | Charcoal           | 98.54                       | 0.36             |
| <b>Zinjanja Test Pit III/Midden</b> 200 m away from Main Platform: Compact, dark gray clayey soil                                        | 4<br>(30–40 cm)       | 95                   | 1696–1726<br>1814–1836<br>1844–1851<br>1869–1872<br>1876–1898<br>1901–1917              | 26               | D-AMS024221 | ZINJANJA Sample 2  | Charcoal           | 98.83                       | 0.32             |

Table S1

| A detailed summary of additional radiocarbon samples from Danamombe and calibrated dates                                                    |                       |                      |                                                                            |                  |             |                  |                    |                             |                  |
|---------------------------------------------------------------------------------------------------------------------------------------------|-----------------------|----------------------|----------------------------------------------------------------------------|------------------|-------------|------------------|--------------------|-----------------------------|------------------|
| Dates from Danamombe Trench I, Main Platform and Test Pit II, Midden                                                                        |                       |                      |                                                                            |                  |             |                  |                    |                             |                  |
| Context/matrix description                                                                                                                  | Level                 | Radiocarbon Age B.P. | Date                                                                       | 1 $\sigma$ Error | Lab Number  | Sample Number    | Material of Sample | Sigma <sup>13</sup> C Value |                  |
|                                                                                                                                             |                       |                      |                                                                            |                  |             |                  |                    | pMC                         | 1 $\sigma$ error |
| <b>Trench I Main Platform:</b><br>Burnt ashy layer lying just below the first four hut floors, but resting on closely packed granite blocks | 40–50<br>(4–5 cm)     | 82                   | 1696–1725<br>1814–1836<br>1845–1850<br>1877–1917                           | 33               | D-AMS025194 | DANAMOMBE Sample | Charcoal           | 98.98                       | 0.41             |
| <b>Trench I Main Platform:</b><br>Heavily burnt ashy layer extending from well-packed blocks, but situated above Hut Floor 5                | 11–12<br>(110–120 cm) | 135                  | 1681–1699<br>1721–1739<br>1744–1763<br>1802–1818<br>1833–1879<br>1915–1938 | 28               | D-AMS025195 | DANAMOMBE Sample | Charcoal           | 98.33                       | 0.34             |
| <b>Trench I Main Platform:</b><br>Large packed blocks lying just under Hut Floor 6 with signs of heavy burning on its floor surface         | 16<br>(150–160 cm)    | 401                  | 1443–1493<br>1602–1613                                                     | 32               | D-AMS025196 | DANAMOMBE Sample | Charcoal           | 95.13                       | 0.38             |
| <b>Trench I Main Platform:</b><br>Artificial platform of large and small packed blocks mixed with loose gritty soil                         | 21<br>(200–210 cm)    | 74                   | 1707–1719<br>1820–1821<br>1825–1832<br>1884–1913                           | 18               | D-AMS025197 | DANAMOMBE Sample | Charcoal           | 99.09                       | 0.22             |

Table S2
